# Supplementary material for: Receptor recognition of transferrin bound to lanthanides and actinides: a discriminating step in cellular acquisition of f-block metals
Source: Royal Society of Chemistry journal article supplement (doi:10.1039/c3mt20237b), 2013-01-01
Supplement: c3mt20237b.pdf [file c3mt20237b.pdf]

Cite this: DOI: 10.1039/c0xx00000x

www.rsc.org/xxxxxx

## Supporting Information

### Receptor recognition of transferrin bound to lanthanides and actinides: a discriminating step in cellular acquisition of *f*-block metals

Gauthier J.-P. Deblonde,<sup>a</sup> Manuel Sturzbecher-Hoehne,<sup>a</sup> Anne B. Mason<sup>b</sup> and Rebecca J. Abergel<sup>\*a</sup>

<sup>a</sup>Chemical Sciences Division, Lawrence Berkeley National Laboratory, Berkeley, CA 94720, USA. E-mail: rjabergel@lbl.gov; Fax: +1 510 486 5596; Tel: +1 510 486 5249

<sup>b</sup>Department of Biochemistry, University of Vermont College of Medicine, Burlington, Vermont 05405-0068, USA

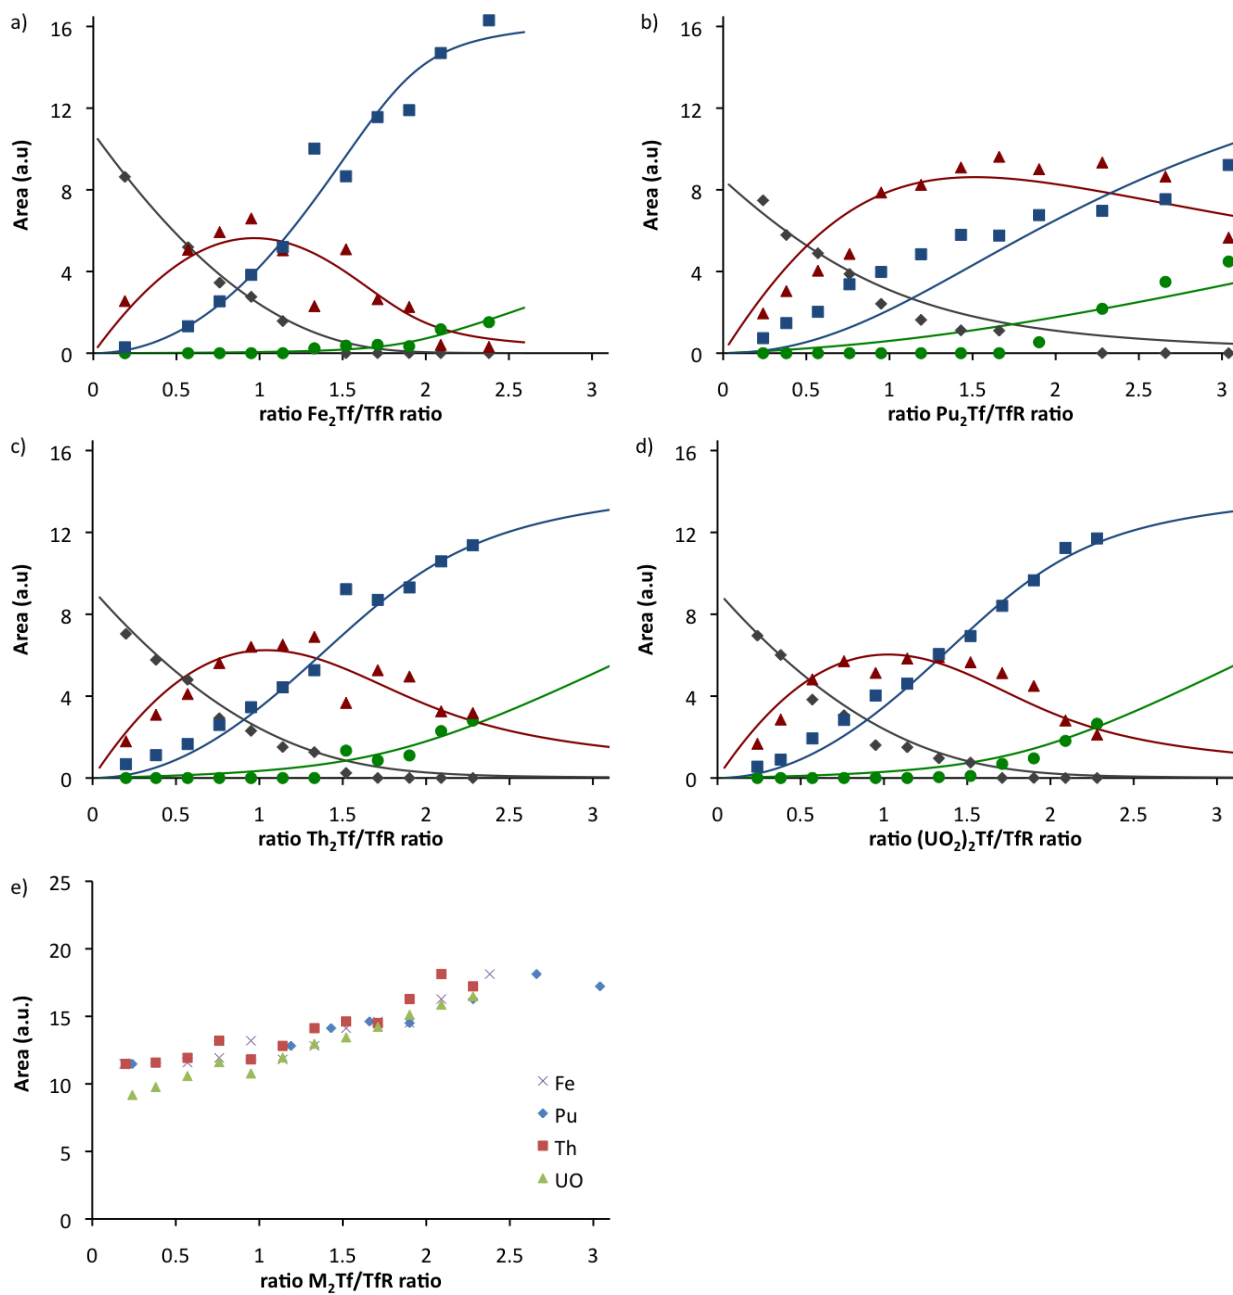

5 **Figure S1.** Extracted peak areas (data points) and corresponding fits (lines) obtain from the recorded chromatograms for samples containing 0.95  $\mu M$   $TfR$  and different  $M_2Tf$  concentrations with **a)**  $Fe_2Tf$ , **b)**  $^{242}Pu_2Tf$ , **c)**  $^{232}Th_2Tf$ , and **d)**  $^{238}(UO_2)_2Tf$  in 100 mM  $NH_4HCO_3$ , pH = 7.4, and eluted at a 0.1 mL  $min^{-1}$  flow rate. In all panels  $TfR:(M_2Tf)_2$  complexes are represented by blue lines and squares,  $TfR:(M_2Tf)$  by red lines and triangles,  $TfR$  by grey lines and diamonds, and  $M_2Tf$  by green lines and circles. **e)** Sum of the extracted peak areas for each species detected during the  $TfR$  binding assay with Fe, Pu, Th and  $UO_2$ , indicating the same metal-independent total amount of detected compounds but a different distribution as shown above.

10
